# Supplementary material for: Disruption of PIKFYVE causes congenital cataract in human and zebrafish
Source: eLife journal article supplement (doi:10.7554/elife.71256), 2022-01-04

Source data for the full raw unedited blots in Figure 2D.

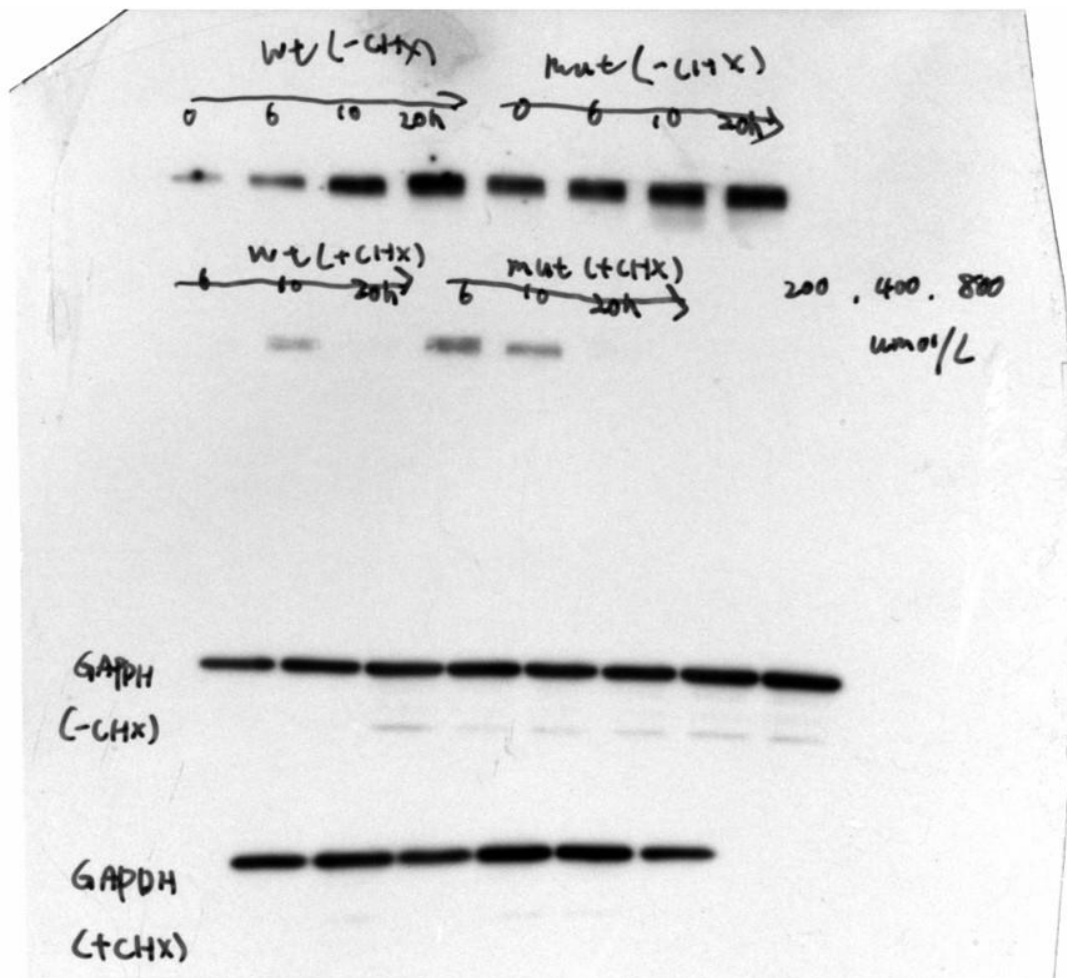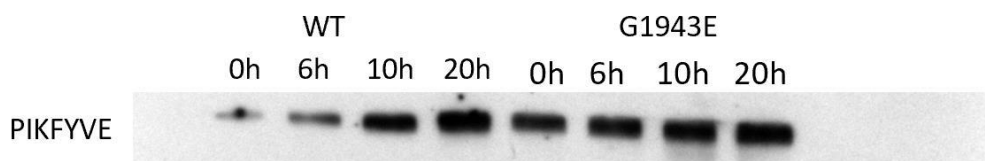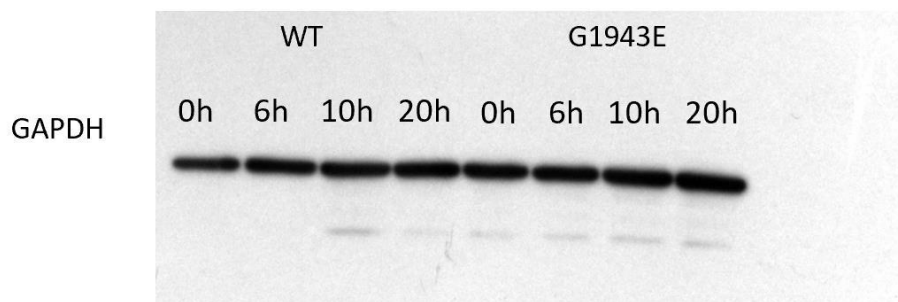

Supplement: fig2-data2 [file elife-71256-fig2-data2-v1.pdf]
