# Supplementary material for: Disruption of PIKFYVE causes congenital cataract in human and zebrafish
Source: eLife. 2022 Jan 13;11:e71256. doi: 10.7554/eLife.71256 (PMC8758139; doi:10.7554/eLife.71256)
Supplement: Figure 2—figure supplement 2—source data 1. [file elife-71256-fig2-figsupp2-data1.xlsx]

## Sheet: Sheet1
Figure 2 supplement 2-source data 1. Clinical manifestation of 7 patients with PIKFYVE variants in 200 cases of cataract patients.
	Patient 1 (1#)		Patient 2 (2#)	Patient 3 (3#)	Patient 4 (4#)	Patient 5 (5#)	Patient 6 (6#)	Patient 7 (7#)
Gender	F		F	F	M	M	F	M
Age of arrival (years)	76		80	69	70	63	69	47
Family history	(-)		(-)	(-)	(-)	(-)	(-)	(-)
BCVA (OD, OS)	20/100,		20/40,	20/32,	FC,	20/100,	20/100,	20/25,
	20/250		20/40	20/50	20/32	LP	20/50	20/25
Type of lens opacity	nuclear		nuclear	nuclear	nuclear	nuclear	nuclear	nuclear
Other ocular defects	(-)		(-)	(-)	(-)	high myopia, macular hole	(-)	high myopia
Gene mutation	exon7:	exon36:	exon9:	exon11:	exon13: c.1654A>G, p.T552A		exon37: c.5594C>T, p.A1865V
	c.881T>A, p.V294D	c.5399A>C, p.Q1800P	c.1051-4G>T	c.1321-13T>C
Genomic locus	exonic	exonic	splicing	splicing	exonic		exonic
SIFT	D	T	NA	NA	T		T
PolyPhen2	P	B	NA	NA	B		B
MutationTaster	D	D	NA	NA	N		D
ClinPred	D	D	NA	NA	T		T
CADD	28.5	22.9	NA	NA	17.71		15.8
DANN	0.987	0.977	NA	NA	0.919		0.944
VEST	0.958	0.365	NA	NA	0.219		0.217
F: female; M: male; BCVA: best corrected visual acuity; OD: eye, oculus dexter; OS: eye, oculus sinister; FC: finger counting; LP: light perception; SIFT: sorting intolerant from tolerant; CADD: combined annotation dependent depletion score; DANN: deleterious annotation of genetic variants using neural networks; VEST: variant effect scoring tool; T: tolerated; D: deleterious; B: benign; P: possib…
