# Supplementary material for: Disruption of PIKFYVE causes congenital cataract in human and zebrafish
Source: eLife. 2022 Jan 13;11:e71256. doi: 10.7554/eLife.71256 (PMC8758139; doi:10.7554/eLife.71256)
Supplement: Figure 2—source data 1. [file elife-71256-fig2-data1.xlsx]

## Sheet: Sheet1
Figure 2D-source data
	Band intensity
	WT		G1943E
	34h	44h	34h	44h
PIKFYVE	26591.4	32640	32077.7	34254.3
GAPDH	20922	22146	24275.6	25764.5
PIKFYVE/GAPDH	1.27098	1.47386	1.3214	1.32952
Figure 2F-source data
	Vacuole number
Cell	DMSO	YM201636
1	3	35
2	4	59
3	3	40
4	0	48
5	0	28
6	0	58
