# Supplementary material for: Disruption of PIKFYVE causes congenital cataract in human and zebrafish
Source: eLife. 2022 Jan 13;11:e71256. doi: 10.7554/eLife.71256 (PMC8758139; doi:10.7554/eLife.71256)
Supplement: Figure 3—figure supplement 1—source data 1. [file elife-71256-fig3-figsupp1-data1.xlsx]

## Sheet: Sheet1
Figure 3 – figure supplement 1B sourse data
	sib		mut
	fish number	survival rate	fish number	survival rate
5dpf	50	1	48	1
6dpf	50	1	48	1
7dpf	50	1	37	0.770833
8dpf	50	1	11	0.229167
9dpf	50	1	0	0
