# Supplementary material for: Disruption of PIKFYVE causes congenital cataract in human and zebrafish
Source: eLife. 2022 Jan 13;11:e71256. doi: 10.7554/eLife.71256 (PMC8758139; doi:10.7554/eLife.71256)
Supplement: Figure 3—figure supplement 3—source data 1. [file elife-71256-fig3-figsupp3-data1.xlsx]

## Sheet: Sheet1
Figure 3 – figure supplement 3 A sourse data
	Vacuole number
fish	sib	Tg(ubi:PIKfyveWT)	pikfyveΔ8	pikfyveΔ8; Tg(ubi:PIKfyveWT)
1	1	1	56	15
2	1	0	67	4
3	8	5	54	7
4	1	3	59	6
5	4	0	62	6
6	1	0	61	4
7	0	5	44
8	2	1	63
9	1	3	69
10	2	3	57
11	0	3
12	0	1
13	1	0
14	1	1
15	0	1
16	6	0
	Vacuole number
fish	sib	Tg(ubi:PIKfyveC1943E)	pikfyveΔ8	pikfyveΔ8; Tg(ubi:PIKfyveG1943E)
1	0	42	1	4
2	2	52	0	1
3	0	69	0	19
4	0	60	0	0
5	0	59	3	5
6	2	62	0	8
7	0	73	1	16
8	1	39	1	0
9	2	72	2	2
10	0	65	4	34
11	0		4	2
12	0		3	1
13			0	1
14			1	18
15			0	1
16			9	34
17			0	2
18			0
19			4
20			1
21			0
22			3
23			0
24			0
25			2
26			1
27			0
28			7
29			2
30			0
31			8
32			1
33			2
34			0
35			4
36			0
37			4
38			0
39			0
40			0
41			3
42			0
43			0
44			3
45			0
46			0
47			3
48			2
49			0
50			1
51			0
52			2
53			0
54			0
55			0
56			0
57			2

## Sheet: Sheet3
0	2	0	0	0	2	0	1	2	0	0	0
42	52	69	60	59	62	73	39	72	65
1	0	0	0	3	0	1	1	2	4	4	3	0	1	0	9	0	0	4	1	0	3	0	0	2	1	0	7	2	0	8	1	2	0	4	0	4	0	0	0	3	0	0	3	0	0	3	2	0	1
4	1	19	0	5	8	16	0	2	34	2	1	1	18	1	34	2
[truncated: 7 more columns]
