# Supplementary material for: Disruption of PIKFYVE causes congenital cataract in human and zebrafish
Source: eLife. 2022 Jan 13;11:e71256. doi: 10.7554/eLife.71256 (PMC8758139; doi:10.7554/eLife.71256)
Supplement: Figure 3—source data 1. [file elife-71256-fig3-data1.xlsx]

## Sheet: Sheet1
Figure 3D sourse data
3dpf	Vacuole number				5dpf	Vacuole number
Fish	+/+	+/-	-/-		Fish	+/+	+/-	-/-
1	0	1	11		1	1	2	42
2	2	2	8		2	0	8	52
3	2	0	18		3	1	0	30
4	0	3	23		4	0	2	29
5	2	1	17		5	0	4	33
6	0	13	29		6	0	7	55
7	2	1	14		7	0	0
8		4			8		0
9		0			9		0
10		2			10		5
					11		14
