# Supplementary material for: Disruption of PIKFYVE causes congenital cataract in human and zebrafish
Source: eLife. 2022 Jan 13;11:e71256. doi: 10.7554/eLife.71256 (PMC8758139; doi:10.7554/eLife.71256)
Supplement: Figure 6—figure supplement 1—source data 1. [file elife-71256-fig6-figsupp1-data1.xlsx]

## Sheet: Sheet1
Figure 6 – figure supplement 1B sourse data
	Vacuole number
fish	pikfyveΔ8	pikfyveΔ8+trpml1 mRNA
1	15	16
2	86	27
3	36	41
4	33	6
5		14
6		44
