# Supplementary material for: Disruption of PIKFYVE causes congenital cataract in human and zebrafish
Source: eLife. 2022 Jan 13;11:e71256. doi: 10.7554/eLife.71256 (PMC8758139; doi:10.7554/eLife.71256)
Supplement: Figure 6—source data 1. [file elife-71256-fig6-data1.xlsx]

## Sheet: Sheet1
Figure 6B-source data
	Vacuole number
Fish	sib+DMSO	sib+ Baf-A1	pikfyveΔ8+DMSO	pikfyveΔ8+ Baf-A1
1	0	1	62	22
2	4	8	77	27
3	0	9	33	18
4	2	8	72	20
5	3	8	88	32
6	4	14	68	25
7	0	28	71	33
8	6	12
9	0	24
10	2	6
Figure 6D-source data
	Vacuole number
Fish	blank		DMSO		Baf-A1
	0h	4.5h	0h	4.5h	0h	4.5h
1	29	42	22	29	29	7
2	27	31	18	26	46	18
3	30	33	13	23	62	24
4	45	47	42	49	19	6
5	27	28	14	21	28	13
6	62	66	17	24	19	16
7	70	82	66	72	16	12
